# Supplementary material for: Transcriptome profiling of Fraxinus excelsior genotypes infested by emerald ash borer
Source: PubMed Central journal article supplement (PMC10556020; doi:10.1038/s41597-023-02588-z), 2023-10-05

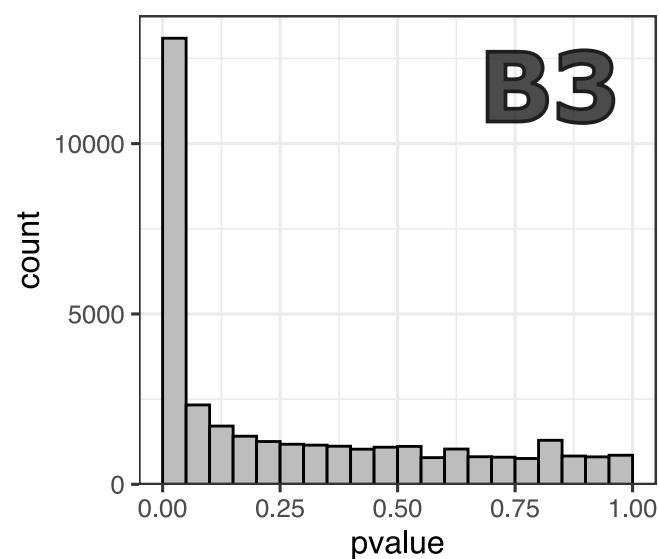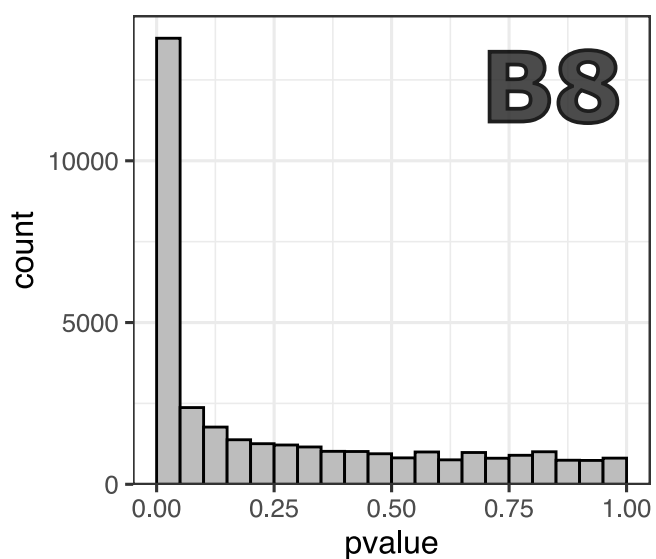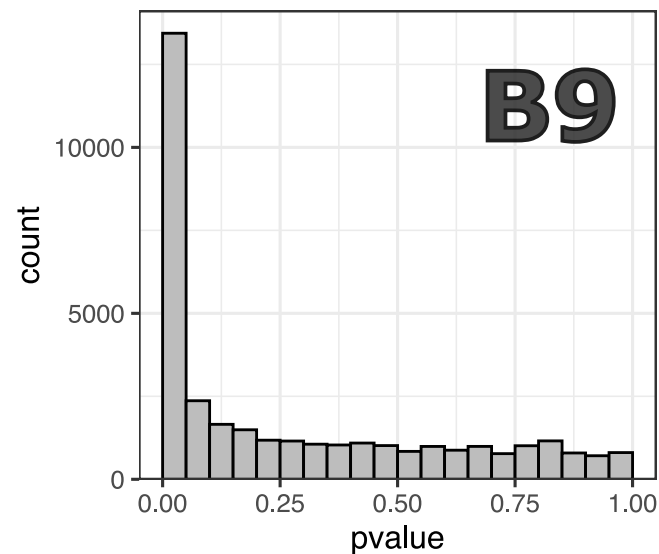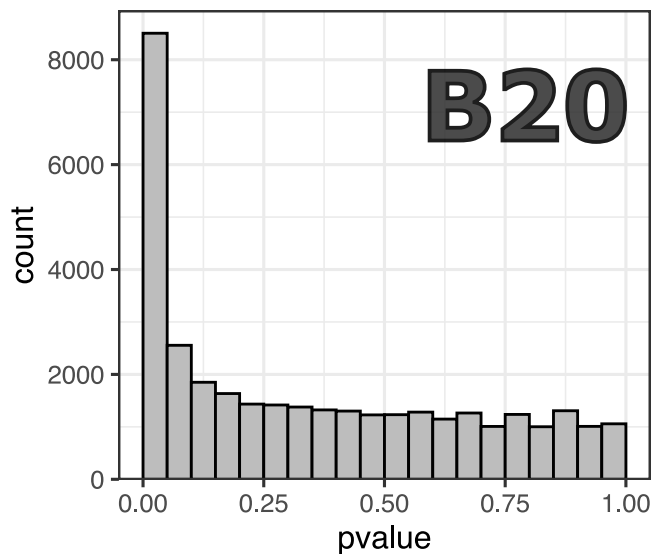

Supplement: 41597_2023_2588_MOESM1_ESM.pdf [file 41597_2023_2588_MOESM1_ESM.pdf]
