# Supplementary material for: Transcriptome profiling of Fraxinus excelsior genotypes infested by emerald ash borer
Source: PubMed Central journal article supplement (PMC10556020; doi:10.1038/s41597-023-02588-z), 2023-10-05
Supplement: 41597_2023_2588_MOESM2_ESM.pdf [file 41597_2023_2588_MOESM2_ESM.pdf]

Supplementary table 1. Summary of RNA-seq data generated under control treatment and EAB infestations. % of reads that aligned concordantly exactly once.

| Sample | Genotype /Provenance | Treatment | EAB resistance | Nr. larvae harvested | Mean dry weight ( $\pm$ SE) | No. of high-quality paired reads | No. of reads and % HISAT2 mapping to BATG-0.5 genome <sup>1</sup> | SRA sample |
|--------|----------------------|-----------|----------------|----------------------|-----------------------------|----------------------------------|-------------------------------------------------------------------|------------|
| CH20   | B3/Tuggen            | Control   | NO             | -                    | -                           | 40,032,476                       | 32,839,497 (82.03%)                                               | DRS310129  |
| CH48   | B3/Tuggen            | Control   | NO             | -                    | -                           | 41,350,056                       | 33,230,313 (80.36%)                                               | DRS310130  |
| CH108  | B3/Tuggen            | Control   | NO             | -                    | -                           | 39,572,646                       | 33,212,473 (83.93%)                                               | DRS310131  |
| CH17   | B3/Tuggen            | EAB       | NO             | 2                    | 19.47 $\pm$ 7.83            | 37,957,108                       | 31,108,723 (81.96%)                                               | DRS310132  |
| CH45   | B3/Tuggen            | EAB       | NO             | 5                    | 7.45 $\pm$ 1.73             | 39,268,923                       | 32,453,291 (82.64%)                                               | DRS310133  |
| CH105  | B3/Tuggen            | EAB       | NO             | 5                    | 1.82 $\pm$ 0.91             | 37,119,654                       | 30,568,577 (82.35%)                                               | DRS310134  |
| CH8    | B20/Tuggen           | Control   | YES            | -                    | -                           | 36,004,294                       | 29,973,397 (83.25%)                                               | DRS310135  |
| CH36   | B20/Tuggen           | Control   | YES            | -                    | -                           | 39,327,045                       | 30,012,232 (76.31%)                                               | DRS310136  |
| CH64   | B20/Tuggen           | Control   | YES            | -                    | -                           | 39,612,295                       | 32,736,832 (82.64%)                                               | DRS310137  |
| CH5    | B20/Tuggen           | EAB       | YES            | 5                    | 0.246 $\pm$ 0.09            | 40,769,175                       | 33,404,826 (81.94%)                                               | DRS31018   |
| CH33   | B20/Tuggen           | EAB       | YES            | 2                    | 8.15 $\pm$ 3.54             | 42,253,998                       | 33,396,354 (79.04%)                                               | DRS310139  |
| CH125  | B20/Tuggen           | EAB       | YES            | 3                    | 1.76 $\pm$ 1.03             | 40,189,347                       | 33,111,100 (82.39%)                                               | DRS310140  |
| CH16   | B8/Quarten Murg      | Control   | NO             | -                    | -                           | 35,128,127                       | 29,021,052 (82.61%)                                               | DRS310141  |
| CH44   | B8/Quarten Murg      | Control   | NO             | -                    | -                           | 39,843,272                       | 33,146,514 (83.19%)                                               | DRS310142  |
| CH100  | B8/Quarten Murg      | Control   | NO             | -                    | -                           | 40,120,624                       | 30,621,621 (76.32%)                                               | DRS310143  |
| CH13   | B8/Quarten Murg      | EAB       | NO             | 5                    | 5.03 $\pm$ 1.36             | 36,227,724                       | 29,389,236 (81.12%)                                               | DRS310144  |
| CH41   | B8/Quarten Murg      | EAB       | NO             | 4                    | 18.67 $\pm$ 7.54            | 39,265,213                       | 31,428,404 (80.04%)                                               | DRS310145  |

|      |                 |         |     |   |           |            |                        |           |
|------|-----------------|---------|-----|---|-----------|------------|------------------------|-----------|
| CH97 | B8/Quarten Murg | EAB     | NO  | 4 | 6.44±1.37 | 39,780,813 | 33,644,905<br>(84.58%) | DRS310146 |
| CH4  | B9/Quarten Murg | Control | YES | - | -         | 39,595,068 | 32,626,422<br>(82.40%) | DRS310147 |
| CH32 | B9/Quarten Murg | Control | YES | - | -         | 40,320,822 | 32,693,802<br>(81.08%) | DRS310148 |
| CH88 | B9/Quarten Murg | Control | YES | - | -         | 36,193,317 | 29,988,350<br>(82.86%) | DRS310149 |
| CH1  | B9/Quarten Murg | EAB     | YES | 3 | 1.23±0.99 | 39,296,185 | 32,096,388<br>(81.68%) | DRS310150 |
| CH29 | B9/Quarten Murg | EAB     | YES | 5 | 3.08±0.71 | 40,376,359 | 33,159,144<br>(82.13%) | DRS310151 |
| CH85 | B9/Quarten Murg | EAB     | YES | 3 | 2.97±0.41 | 36,797,735 | 30,126,786<br>(81.87%) | DRS310152 |

Supplementary table 2. Differential gene expression between *Fraxinus excelsior* control trees and Emerald Ash Borer infested trees. N.B. upregulated genes are those which are expressed in EAB infested trees & downregulated genes are those which are expressed in control trees. Total expressed genes are the number of unique occurrences of each DEG. Thresholds for differential gene expression; *P* adjusted value less than or equal to 0.05 and log fold change greater than or equal to 2 for upregulated genes and a log fold change less than -2 for downregulated genes. DEGs = differentially expressed genes.

| <i>F. excelsior</i> genotype | Number of upregulated genes | Number of downregulated genes | Total number of DEGs |
|------------------------------|-----------------------------|-------------------------------|----------------------|
| B3                           | 611                         | 2194                          | 2805                 |
| B8                           | 2677                        | 1202                          | 3879                 |
| B9                           | 2311                        | 967                           | 3278                 |
| B20                          | 1010                        | 359                           | 1369                 |
| Total expressed genes        | 4241                        | 1876                          | 6094                 |

Supplementary figure 1. *P*-value distribution of differentially expressed genes in control treatments vs. infested treatments in genotypes B3, B8, B9 and B20.
